# Supplementary material for: A comparative study of the effects of different fucoidans on cefoperazone-induced gut microbiota disturbance and intestinal inflammation
Source: Royal Society of Chemistry journal article supplement (doi:10.1039/d1fo00782c), 2021-01-01
Supplement: d1fo00782c1.pdf [file d1fo00782c1.pdf]

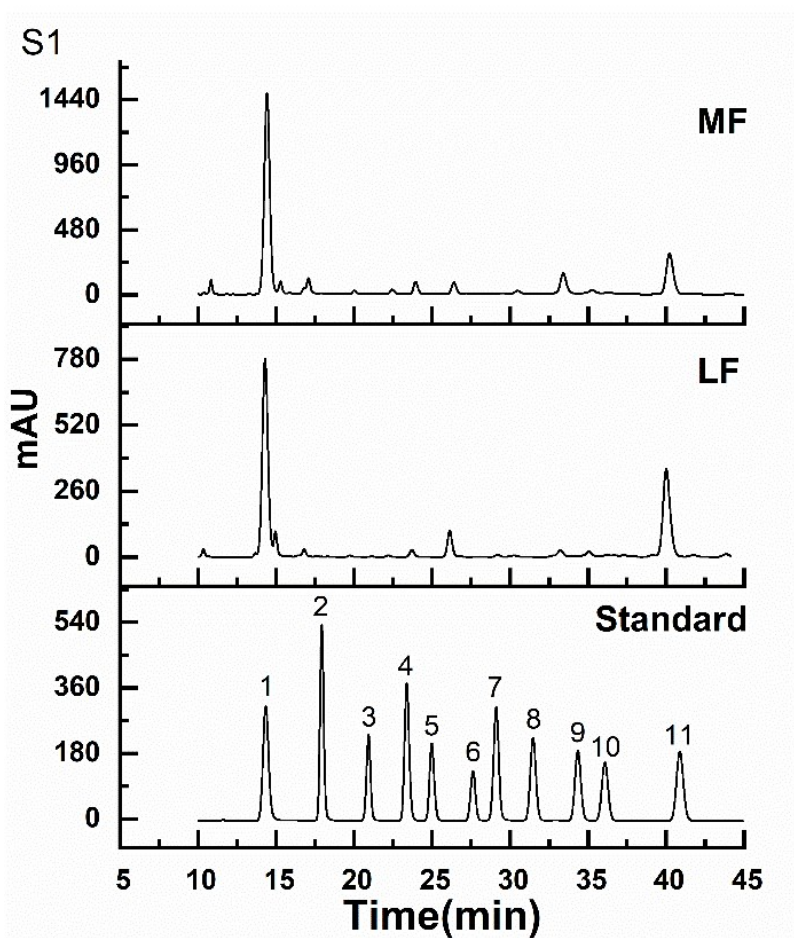

**Supplementary Fig. 1** Monosaccharide composition of LF and MF by HPLC analysis.

1. PMP ( $C_{10}H_{10}N_2O$ ), 2. Mannose, 3. Glucosamine, 4. Rhamnose, 5. Glucuronic acid, 6. Lactose, 7. Galactosamine, 8. Glucose, 9. Galactose, 10. Xylose, 11. Fucose.

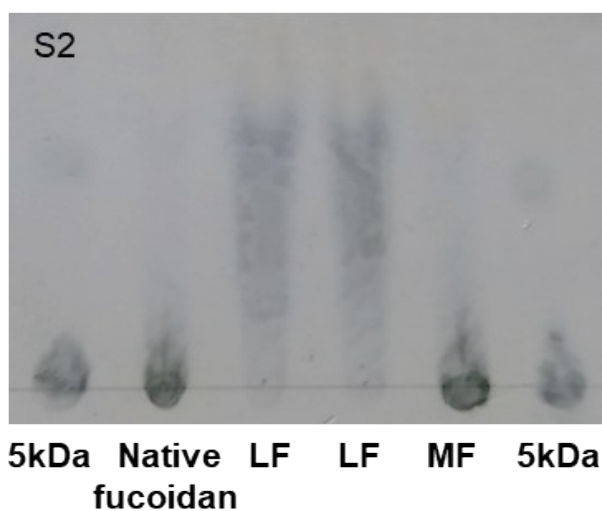

**Supplementary Fig.2** Oligosaccharide analysis of LF and MF by thin layer chromatography (TLC).

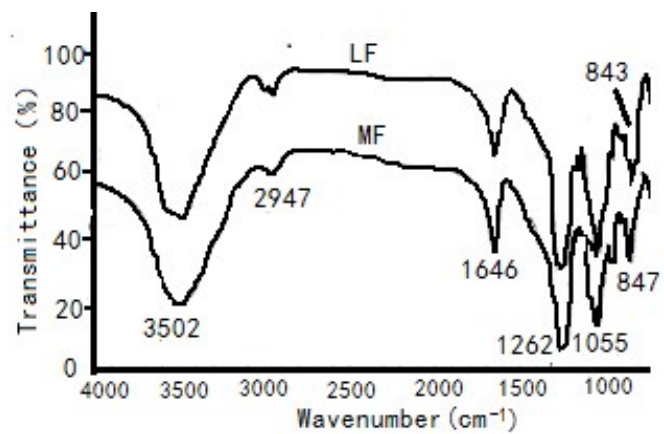

**Supplementary Fig.3** IR analysis of LF and MF
